# Supplementary material for: Cobaloxime tethered pyridine-functionalized ethylene-bridged periodic mesoporous organosilica as an efficient HER catalyst
Source: Royal Society of Chemistry journal article supplement (doi:10.1039/d1se01437d), 2021-11-26
Supplement: d1se01437d1.pdf [file d1se01437d1.pdf]

*Electronic Supplementary Information*

**Cobaloxime tethered pyridine-functionalized ethylene bridged periodic mesoporous organosilica as efficient HER catalyst**

M<sup>a</sup> Ángeles Navarro,<sup>a</sup> Daniel Cosano,<sup>a</sup> Asamanjoy Bhunia,<sup>b</sup> Laura Simonelli,<sup>c</sup> Vlad Martin-Diaconescu,<sup>c</sup> Francisco J. Romero-Salguero<sup>a\*</sup> and Dolores Esquivel<sup>a\*</sup>

<sup>a</sup>Department of Organic Chemistry, Nanochemistry and Fine Chemistry Research Institute (IUIQFN), Faculty of Sciences, University of Córdoba, Campus de Rabanales, Marie Curie Building, Ctra. Nnal. IV, km 396, 14071 Córdoba, Spain.

<sup>b</sup> Department of Chemistry, Inorganic Chemistry Section, Jadavpur University, Kolkata 700032, India

<sup>c</sup> ALBA Synchrotron Light Facility, Carrer de la Llum 2-26, 08290 Cerdanyola del Vallès, Spain

\*([go2rosaf@uco.es](mailto:go2rosaf@uco.es) (F.J.R.-S.); [q12esmem@uco.es](mailto:q12esmem@uco.es) (D.E.))

## Synthesis of ethylene-bridged PMO

Ethylene-bridged PMO material was synthesized following a procedure described by Burleigh and col.<sup>1</sup> Typically, 6 gr of Brij 76 was added in a solution containing 19.6 ml of HCl and 279 ml of H<sub>2</sub>O. The mixture was stirred at 50 °C for 24 h. Afterwards, 15.9 ml of bis-silane precursor, 1,2-bis(triethoxysilyl)ethane, was added dropwise to the clear solution and it was stirred at 50 °C for 24 h. Then, the mixture was aged at 90°C overnight under static conditions. The final solid was filtered under vacuum and washed with plenty of water.

To remove the surfactant, 1g of synthesized material was refluxed in acid ethanolic solution (1ml conc. HCl:50 ml ethanol) for 12h. This process was repeated twice. Finally, the white solid was collected and dried under vacuum at 120 °C overnight (Scheme S1).

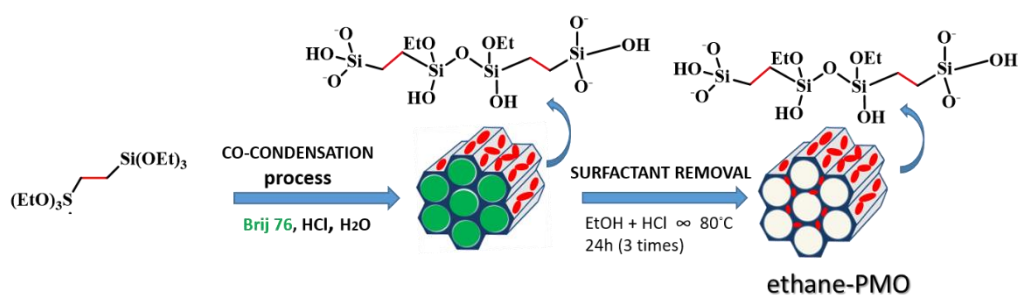

**Scheme S1.** Synthesis route of ethylene-bridged PMO material.

<sup>1</sup> M. C. Burleigh, S. Jayasundera, C. W. Thomas, M. S. Spector, M. A. Markowitz and B. P. Gaber, *Colloid Polym. Sci.*, 2004, **282**, 728–733.

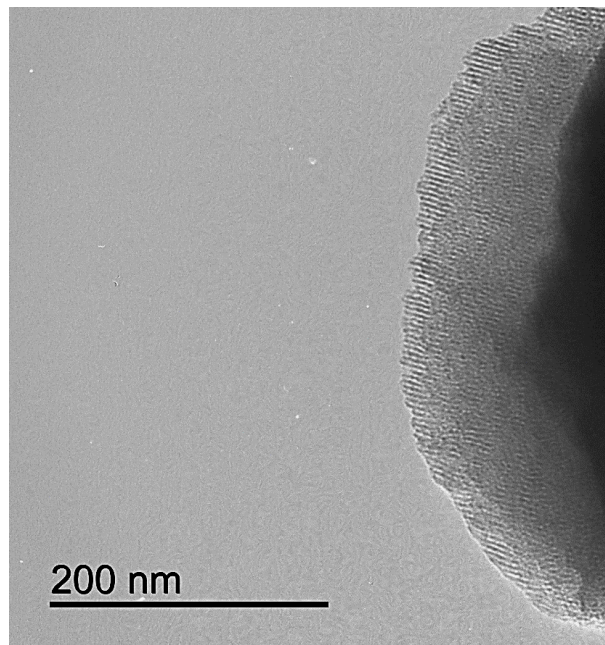

**Fig S1.** TEM image of py-etPMO.

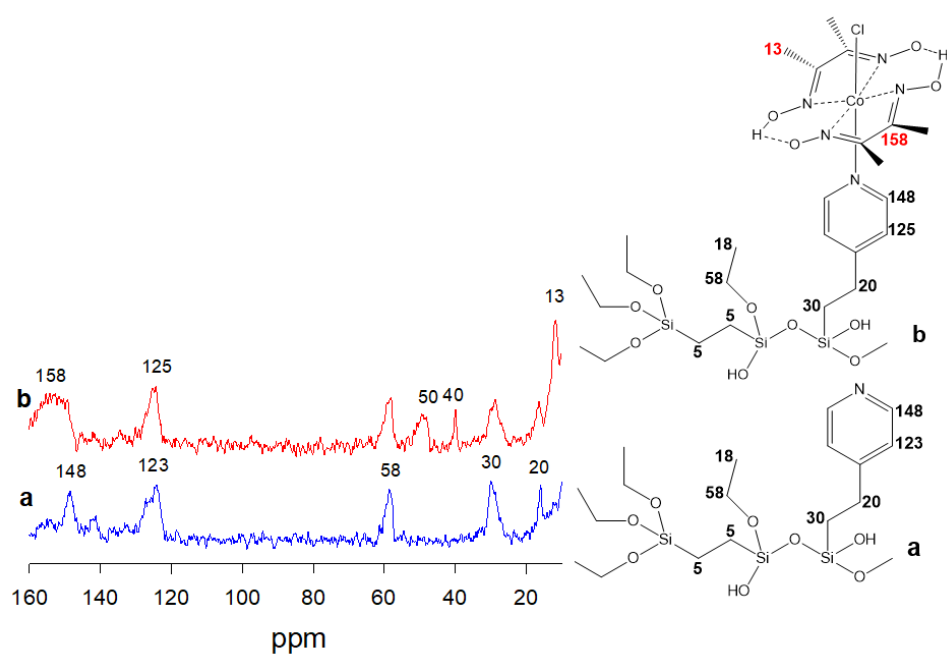

**Fig S2.** <sup>13</sup>C CP/MAS NMR spectra of py-etPMO (a) and py-etPMO-Co (b) excluding signal associated to Csp<sup>3</sup> of the ethylene bridges.

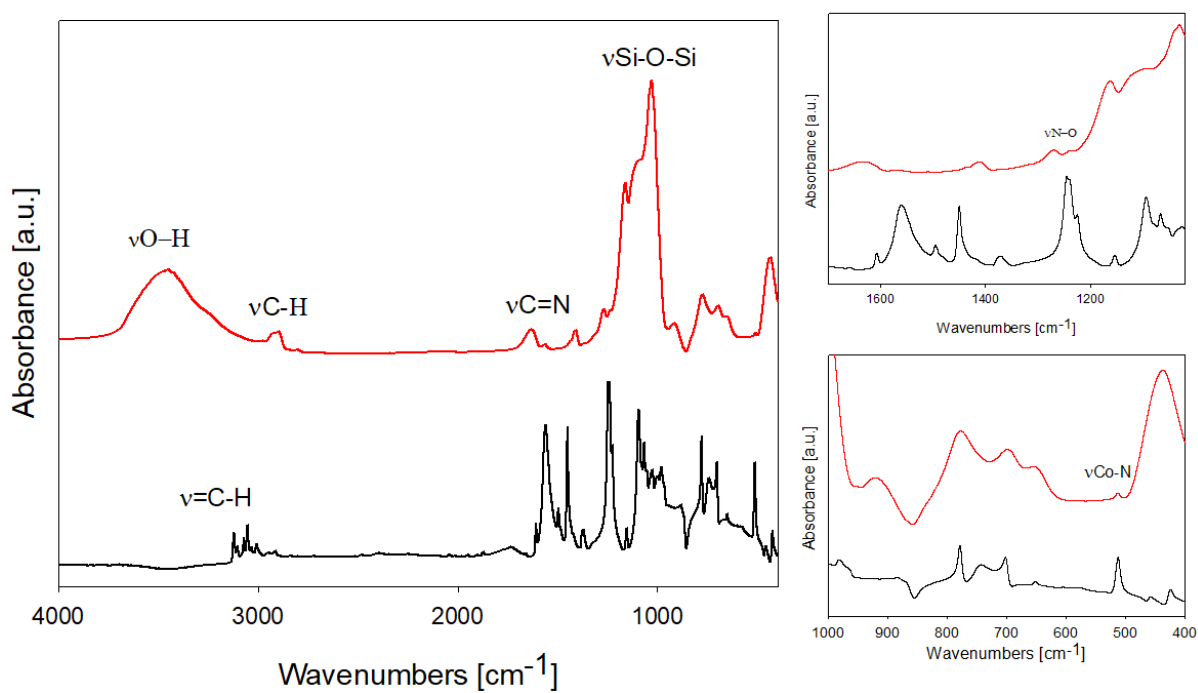

**Fig S3.** FT-IR spectra of Co(dmgh)<sub>2</sub>pyCl complex (black) and py-etPMO-Co catalyst (red).

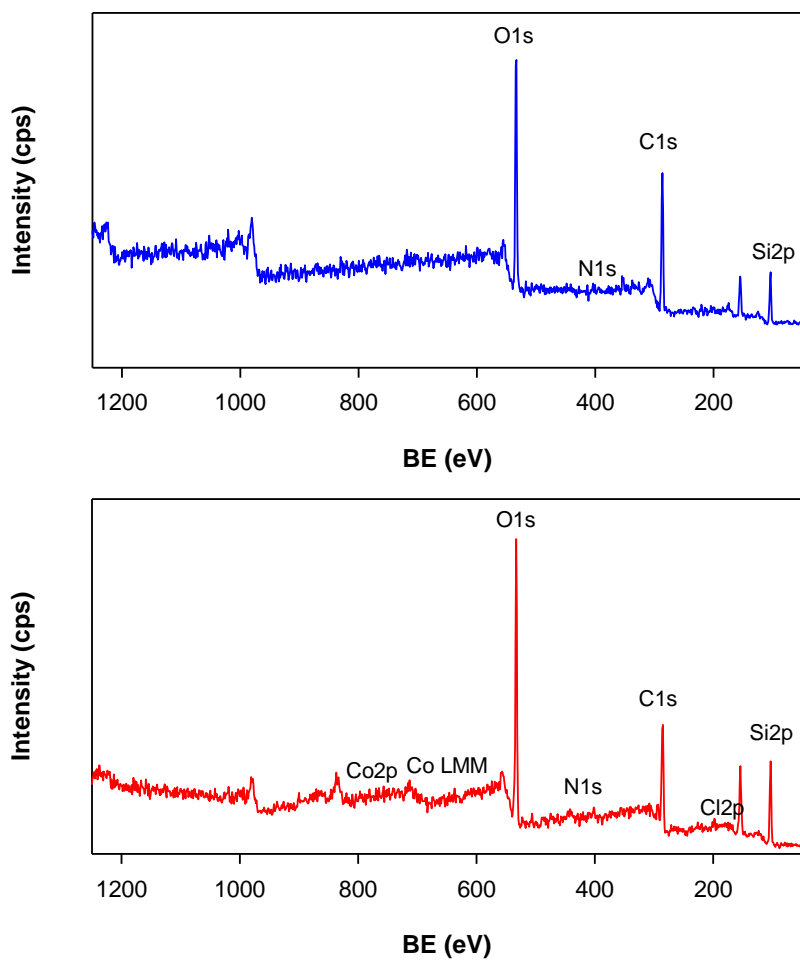

**Fig S4.** Survey spectra of py-etPMO (blue) and py-etPMO-Co (red).

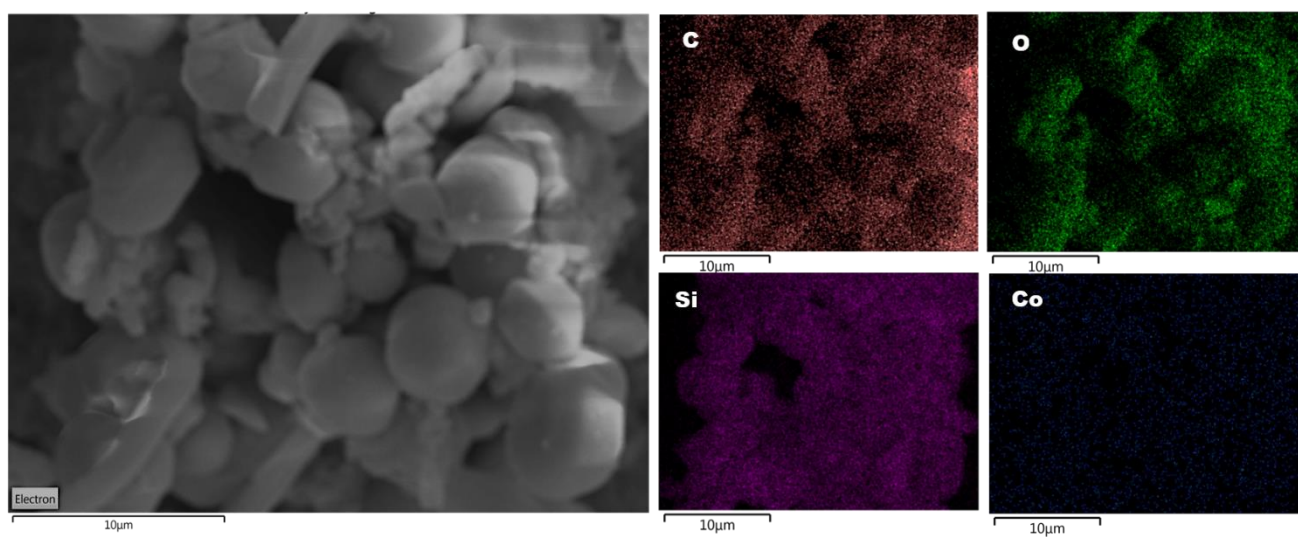

**Fig S5.** SEM image of py-etPMO-Co and corresponding EDX elemental analysis maps.

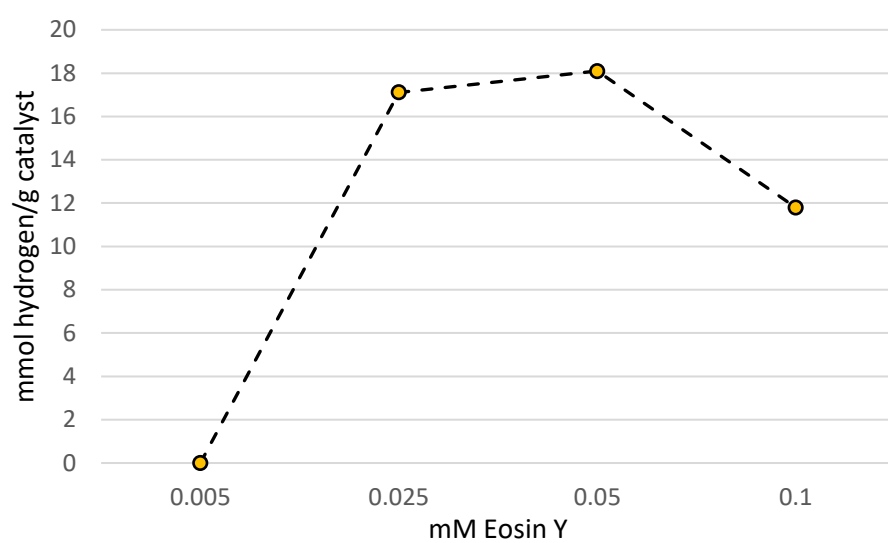

**Fig S6.** Effect of EY concentration on hydrogen production activity of py-etPMO-Co (catalyst, 1 mg; TEOA, 0.75 mM; reaction time, 4 h).



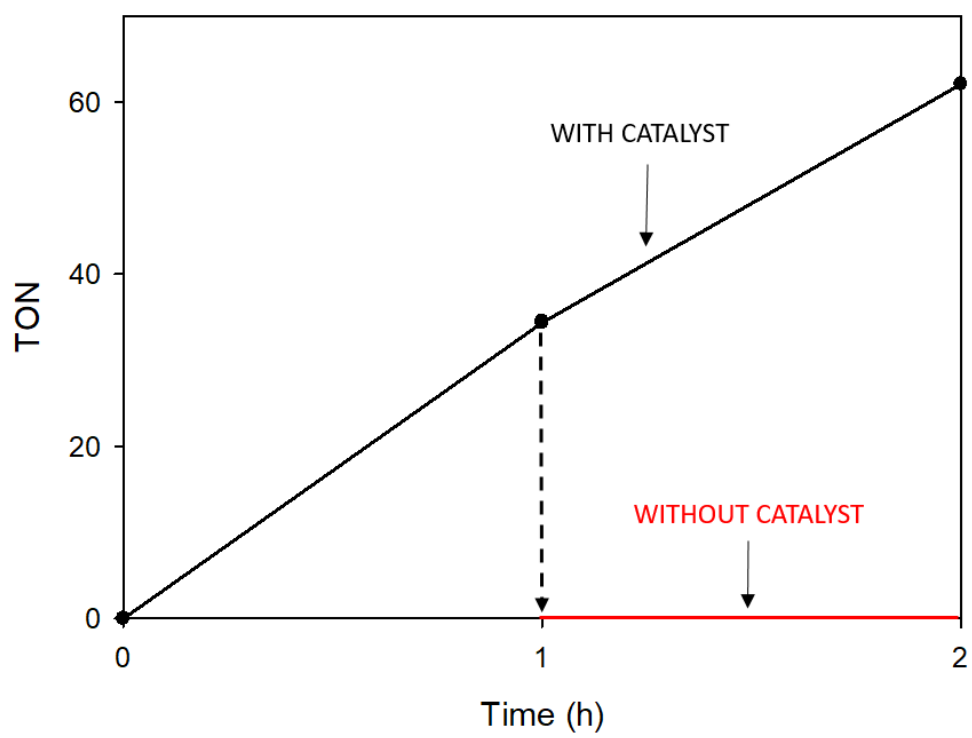

**Fig S7.** Catalytic test after removing catalyst.

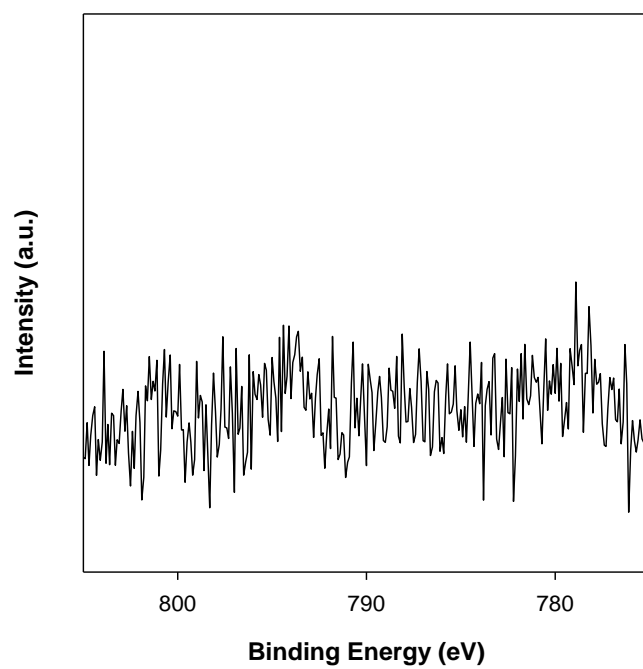

**Fig S8.** Co<sub>2</sub>p XPS spectrum of py-etPMO-Co after photocatalysis.

**Table S1.** Compositional analysis of py-etPMO and py-etPMO-Co

| <b>Sample</b> | <b>%wt. Nitrogen<sup>a</sup></b> | <b>mmol of Nitrogen per gram</b> | <b>mmol of Co per gram<sup>b</sup></b> |
|---------------|----------------------------------|----------------------------------|----------------------------------------|
| py-etPMO      | 0.57                             | 0.41                             | n.d                                    |
| py-etPMO-Co   | n.d                              | n.d                              | 0.16                                   |
| ethane-PMO    | -                                | -                                | $0.792 \times 10^{-3}$                 |

<sup>a</sup> Determined by elemental analysis

<sup>b</sup> Obtained by ICP-MS

**Table S2.** Comparison of the photocatalytic performance of py-etPMO-Co for HER with previously reported heterogenized molecular hydrogen evolution reaction catalysts.

| Catalyst                                                  | Support     | External Sensitizer                  | Time (h) | H <sub>2</sub> evolution rate (mmol g <sup>-1</sup> ) | TON  | Ref.      |
|-----------------------------------------------------------|-------------|--------------------------------------|----------|-------------------------------------------------------|------|-----------|
| Co(dmgh <sub>2</sub> )(dmgh)Cl <sub>2</sub>               | py-etPMO    | Eosin Y                              | 4        | 18.1                                                  | 113  | This work |
| Co(dmgh) <sub>2</sub> (4-HEP)Cl <sup>a</sup>              | MIL-101(Cr) | Eosin Y                              | 5        | 8                                                     | 20   | 2         |
| Co(dmgh <sub>2</sub> )(dmgh)pyCl                          | COF         | -                                    | 13       | 11.8                                                  | 170  | 3         |
| Cobaloxime - complex                                      | Polymer     | Ru(bpy) <sub>3</sub> Cl <sub>2</sub> | 5        | 0.9                                                   | 2.8  | 4         |
| Fe <sub>2</sub> (dcbdt)(CO) <sub>6</sub> <sup>b</sup>     | Zr(IV)-MOF  | Ru(bpy) <sub>3</sub> Cl <sub>2</sub> | 2.5      | 3.5                                                   | 5.9  | 5         |
| Fe <sub>2</sub> (cbdt)(CO) <sub>6</sub> <sup>c</sup>      | MIL-101(Cr) | Ru(bpy) <sub>3</sub> Cl <sub>2</sub> | 2.3      | 3                                                     | 18.5 | 6         |
| Fe <sub>2</sub> S <sub>2</sub> (CO) <sub>6</sub> -complex | UiO-MOF     | polypyridyl ruthenium                | 50       | 0.032                                                 | 16   | 7         |
| [FeFe]-hydrogenase                                        | SH-PMO      | Ru(bpy) <sub>3</sub> Cl <sub>2</sub> |          | 0.0009                                                | 12   | 8         |

<sup>a</sup>4-HEP: 4-(2-hydroxyethyl)pyridine

<sup>b</sup>dcbdt: 1,4-dicarboxylbenzene-2,3-dithiolate

<sup>c</sup>cbdt: 3-carboxybenzene-1,2-dithiolate

<sup>2</sup> S. Roy, A. Bhunia, N. Schuth, M. Haumann and S. Ott, *Sustain. Energy Fuels*, 2018, **2**, 1148–1152.

<sup>3</sup> K. Gottschling, G. Savasci, H. Vignolo-González, S. Schmidt, P. Mauker, T. Banerjee, P. Rovó, C. Ochsenfeld and B. V. Lotsch, *J. Am. Chem. Soc.*, 2020, **142**, 12146–12156.

<sup>4</sup> R. R. Haikal, X. Wang, Y. S. Hassan, M. R. Parida, B. Murali, O. F. Mohammed, P. J. Pellechia, M. Fontecave and M. H. Alkordi, *ACS Appl. Mater. Interfaces*, 2016, **8**, 19994–20002.

<sup>5</sup> S. Pullen, H. Fei, A. Orthaber, S. M. Cohen and S. Ott, *J. Am. Chem. Soc.*, 2013, **135**, 16997–17003.

<sup>6</sup> S. Roy, V. Pascanu, S. Pullen, G. González Miera and S. Ott, *Chem. Commun.*, 2017, **53**, 3257–3260.

<sup>7</sup> A. W. Wang, X. Song and Z. Hong, *Applied Catal. B, Environ.*, 2019, **258**, 117979.

<sup>8</sup> T. Himiyama, M. Waki, D. Esquivel, A. Onoda and T. Hayashi, *ChemCatChem*, 2018, **10**, 4894–4899.
